# Supplementary material
Source: Springer Nature journal article supplement (https://www.springermedizin.de/resource/supplementary/12885_2009_1611_MOESM3_ESM.pdf/9472462)
Supplement: MOESM3 [file 9472462]

Persons with a referral of a GP/  
other specialist to the outpatient  
clinic of the Segal Cancer Centre

Patients contact the secretary to  
make the first appointment

Secretary keeps a list of  
new patients and their  
first appointment

The oncologist/ hematologist/  
surgeon sees the patient and plans  
further investigation/ plans first  
treatment / refers to another  
specialist

Letter for doctor in the chart  
with the aim of the study  
and eligibility criteria and  
the patient information  
letter

Patient is booked for first treatment  
on the treatment floor and often the  
patient meet the nurse assigned to  
him/her during treatment /patient is  
booked for surgery

If patient is eligible, the  
doctor asks if the patient  
can be contacted by the  
research team to explain  
the study and doctor gives  
the patient information  
letter

Patient comes back for  
treatment/surgery

Patient is contacted by a  
member of the research  
team, and if the patient  
agrees to participate a  
date and time for the first  
interview is set
